# Supplementary material for: Measurement Report: Exchange Fluxes of HONO over Agricultural Fields in the North China Plain
Source: Copernicus journal article supplement (doi:10.5194/egusphere-2023-1223), 2023-07-10
Supplement: Supplementary file 1 [file egusphere-2023-1223-supplement.pdf]

---

Supporting Information for *Atmos. Chem. Phys.* manuscript:

**Measurement Report: Exchange Fluxes of HONO over  
Agricultural Fields in the North China Plain**

Yifei Song<sup>1,3,#</sup>, Chaoyang Xue<sup>2,#,\*</sup>, Yuanyuan Zhang<sup>1,3,\*</sup>, Pengfei Liu<sup>1,3</sup>, Fengxia Bao<sup>2</sup>,  
Xuran Li<sup>4</sup>, Yujing Mu<sup>1,3,\*</sup>

<sup>1</sup> Research Center for Eco-Environmental Sciences, Chinese Academy of Sciences,  
Beijing 100085, China

<sup>2</sup> Max Planck Institute for Chemistry, Mainz 55128, Germany

<sup>3</sup> University of Chinese Academy of Sciences, Beijing 100049, China

<sup>4</sup> Rural Energy and Environment Agency, Ministry of Agriculture and Rural Affairs,  
Beijing 100125, China

# These authors contributed equally to this work.

**Correspondence:**

Chaoyang Xue ([ch.xue@mpic.de](mailto:ch.xue@mpic.de))

Yuanyuan Zhang ([yyzhang@rcees.ac.cn](mailto:yyzhang@rcees.ac.cn))

Yujing Mu ([yjmu@rcees.ac.cn](mailto:yjmu@rcees.ac.cn))

**This file includes (6 pages)**

Table S1

Figures S1 to S4

**Table 1.** Statistical parameters for HONO fluxes at 12h intervals. PFP: pre-fertilization period (before June 18); HEP: high HONO emission period (from June 18 to July 10); LEP: low HONO emission period (after July 10).

| Flux<br>(ng N m <sup>-2</sup> s <sup>-1</sup> ) | PFP   |       | HEP   |       | LEP   |       |
|-------------------------------------------------|-------|-------|-------|-------|-------|-------|
|                                                 | NP    | CK    | NP    | CK    | NP    | CK    |
| AVG                                             | 0.54  | -0.51 | 97.7  | -0.36 | 1.03  | -2.88 |
| SD <sup>a</sup>                                 | 0.35  | 0.13  | 8.6   | 0.04  | 3.17  | 2.41  |
| MAX <sup>b</sup>                                | 0.91  | 0.44  | 319   | 1.78  | 8.15  | 1.68  |
| MIN <sup>c</sup>                                | -0.05 | -1.65 | -1.14 | -3.29 | -5.52 | -8.55 |

a: SD represents the standard deviation between the three duplicates in parallel.

<sup>b, c</sup>: MAX and MIN represent the maximum and minimum values of the observed HONO flux.

---

## Figures

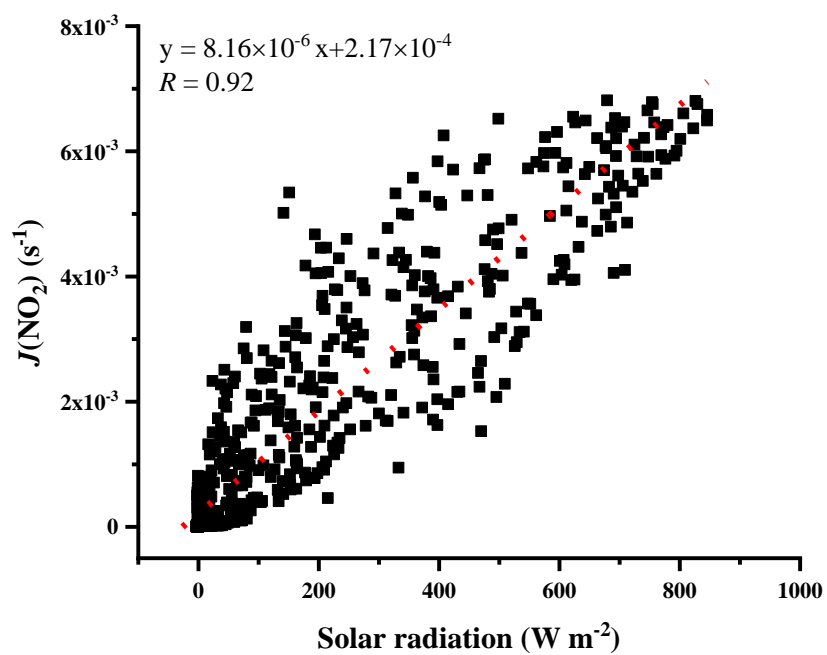

**Figure S1.** Correlation between the measured  $J(\text{NO}_2)$  and solar radiation (August 28–September 30, 2021).

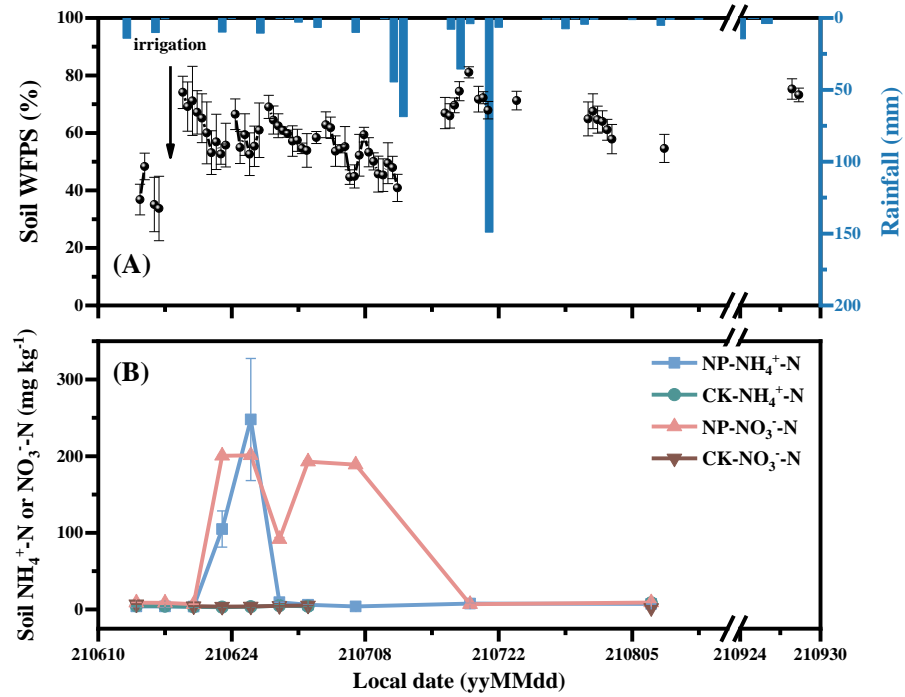

**Figure S2.** Variations of soil water-filled pore space (WFPS) and rainfall (A), concentrations of soil  $\text{NH}_4^+\text{-N}$  and  $\text{NO}_3^-\text{-N}$  from the NP (chemical N fertilizer + normal irrigation), and CK (no fertilization but with normal irrigation) plots (B) during the maize growing season. Error bars represent the standard deviations ( $n=5$  for soil WFPS and 3 for soil  $\text{NH}_4^+\text{-N}$  and  $\text{NO}_3^-\text{-N}$  concentrations).

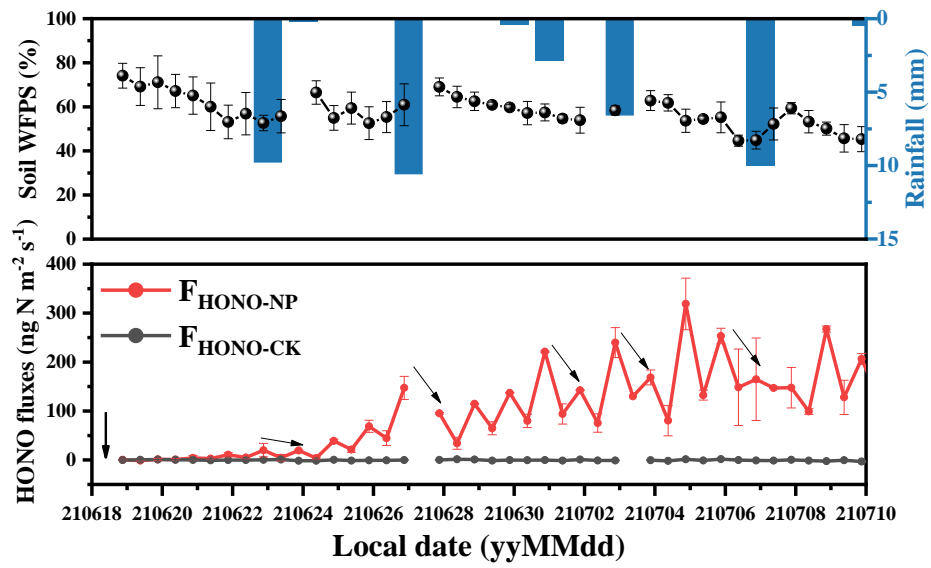

**Figure S3.** Influence of rainfall on soil HONO emissions and soil water-filled pore space (WFPS).

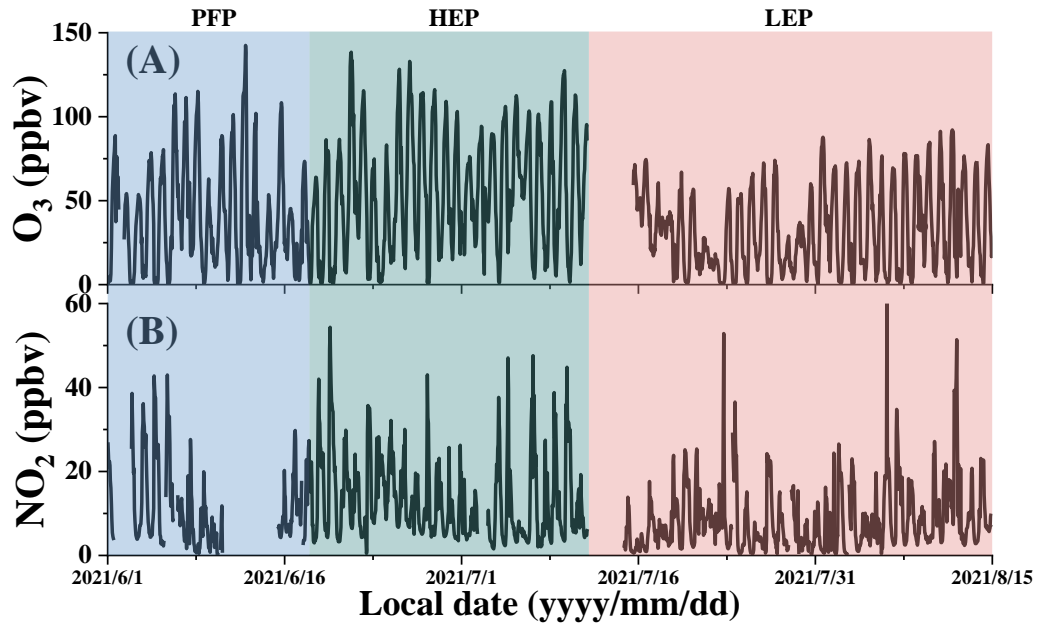

**Figure S4.** Time series of atmospheric O<sub>3</sub> (A) and NO<sub>2</sub> (B) concentrations at the observation site from June 1 to August 15, 2021.
